# Supplementary material
Source: publisher site journal article supplement (https://static.cambridge.org/content/id/urn:cambridge.org:id:article:S2631717621000074/resource/name/S2631717621000074supp002.docx)
Supplement: Supplementary file 1 [file S2631717621000074supp002.docx]

**Video Legend**

Decoupled Energy Storage and Return (DESR) prosthesis prototype shown. As the ankle joint rotates, a magnet-based switching system alternates the engagement of the two cam profiles, thereby enabling different torque-angle and energy storage mechanics associated with each cam profile.
